1 **Ad26.COV2.S-elicited immunity protects against G614 spike variant SARS-**  
2 **CoV-2 infection in Syrian hamsters and does not enhance respiratory disease**  
3 **in challenged animals with breakthrough infection after sub-optimal vaccine**  
4 **dosing**

5

6 Authors

7 Joan E.M. van der Lubbe<sup>1\*</sup>, Sietske K. Rosendahl Huber<sup>1</sup>, Aneesh Vijayan<sup>1</sup>, Liesbeth Dekking<sup>1</sup>,  
8 Ella van Huizen<sup>1</sup>, Jessica Vreugdenhil<sup>1</sup>, Ying Choi<sup>1</sup>, Miranda R.M. Baert<sup>1</sup>, Karin Feddes-de Boer<sup>1</sup>,  
9 Ana Izquierdo Gil<sup>1</sup>, Marjolein van Heerden<sup>2</sup>, Tim J. Dalebout<sup>3</sup>, Sebenzile K. Myeni<sup>3</sup>, Marjolein  
10 Kikkert<sup>3</sup>, Eric J. Snijder<sup>3</sup>, Leon de Waal<sup>4</sup>, Koert J. Stittelaar<sup>5</sup>, Jeroen T.B.M. Tolboom<sup>1</sup>, Jan  
11 Serroyen<sup>1</sup>, Leacky Muchene<sup>1</sup>, Leslie van der Fits<sup>1</sup>, Lucy Rutten<sup>1</sup>, Johannes P.M. Langedijk<sup>1</sup>, Dan  
12 H. Barouch<sup>6</sup>, Hanneke Schuitemaker<sup>1</sup>, Roland C. Zahn<sup>1</sup>, Frank Wegmann<sup>1</sup>

13

14 <sup>1</sup> Janssen Vaccines & Prevention B.V., Leiden, The Netherlands

15 <sup>2</sup> Janssen Non-Clinical Safety B.V., Beerse, Belgium

16 <sup>3</sup> Molecular Virology Laboratory, Department of Medical Microbiology, Leiden University  
17 Medical Center, Leiden, The Netherlands

18 <sup>4</sup> Viroclinics Biosciences B.V., Viroclinics Xplore, Schaijk, The Netherlands

19 <sup>5</sup> Wageningen Bioveterinary Research, Lelystad, The Netherlands

20 <sup>6</sup> Center for Virology and Vaccine Research, Beth Israel Deaconess Medical Center, Harvard  
21 Medical School, Boston, MA 02215, USA

22

23 **Corresponding author:**

24 \* [Jvander7@its.jnj.com](mailto:Jvander7@its.jnj.com)

25 **ABSTRACT**

26 Previously we have shown that a single dose of recombinant adenovirus serotype 26 (Ad26)  
27 vaccine expressing a prefusion stabilized SARS-CoV-2 spike antigen (Ad26.COVS) is  
28 immunogenic and provides protection in Syrian hamster and non-human primate SARS-CoV-2  
29 infection models. Here, we investigated the immunogenicity, protective efficacy and potential for  
30 vaccine-associated enhanced respiratory disease (VAERD) mediated by Ad26.COVS in a  
31 moderate disease Syrian hamster challenge model, using the currently most prevalent G614 spike  
32 SARS-CoV-2 variant. Vaccine doses of  $1 \times 10^9$  vp and  $1 \times 10^{10}$  vp elicited substantial neutralizing  
33 antibodies titers and completely protected over 80% of SARS-CoV-2 inoculated Syrian hamsters  
34 from lung infection and pneumonia but not upper respiratory tract infection. A second vaccine  
35 dose further increased neutralizing antibody titers which was associated with decreased infectious  
36 viral load in the upper respiratory tract after SARS-CoV-2 challenge. Suboptimal non-protective  
37 immune responses elicited by low-dose Ad26.COVS vaccination did not exacerbate respiratory  
38 disease in SARS-CoV-2-inoculated Syrian hamsters with breakthrough infection. In addition,  
39 dosing down the vaccine allowed to establish that binding and neutralizing antibody titers correlate  
40 with lower respiratory tract protection probability. Overall, these pre-clinical data confirm efficacy  
41 of a 1-dose vaccine regimen with Ad26.COVS in this G614 spike SARS-CoV-2 virus variant  
42 Syrian hamster model, show the added benefit of a second vaccine dose, and demonstrate that  
43 there are no signs of VAERD under conditions of suboptimal immunity.

44

## 45 INTRODUCTION

46 Severe Acute Respiratory Syndrome Coronavirus 2 (SARS-CoV-2), the etiological agent of  
47 coronavirus disease 2019 (COVID-19), is responsible for an unprecedented crisis in the world<sup>1</sup>.  
48 While physical measures such as social distancing and deployment of face masks are being  
49 employed to reduce the spread of the virus, safe and effective vaccines are crucial to contain this  
50 pandemic.

51 We recently demonstrated that a single dose of adenovirus serotype 26 (Ad26) vaccine expressing  
52 a pre-fusion stabilized spike antigen (Ad26.CoV2.S) is immunogenic in animals and humans<sup>2-5</sup>  
53 and protected rhesus macaques against challenge with SARS-CoV-2<sup>2</sup>. Protection correlated with  
54 SARS-CoV-2 binding and neutralizing antibodies, in agreement with findings with other COVID-  
55 19 vaccine candidates<sup>6-8</sup>.

56 We have also demonstrated vaccine mediated protection against SARS-CoV-2 challenge in Syrian  
57 hamsters. In this animal model, SARS-CoV-2 infection is characterized by severe clinical disease  
58 including body weight loss and respiratory tract histopathology upon high-dose intranasal  
59 challenge<sup>3,9-11</sup>, mimicking findings in humans where viral inoculum size has been correlated with  
60 disease severity<sup>12-15</sup>. In those studies, challenge in Syrian hamsters was performed with SARS-  
61 CoV-2 USA-WA1/2020 which has a 100% homologous spike sequence to the Ad26.COVS.S  
62 vaccine antigen<sup>3,4</sup>. Since then, SARS-CoV-2 variants with a D614G spike substitution have  
63 become most prevalent<sup>16,17</sup>, albeit recently new strains with additional mutations in spike further  
64 distant from the original Wuhan strain are emerging and became more widespread<sup>18-20</sup>. In Syrian  
65 hamsters, comparison of a SARS-CoV-2 strain with and without the D614G substitution in the  
66 spike protein indicated that the G614 variant produced higher infectious viral titers in the upper  
67 respiratory tract and increases competitive fitness<sup>21,22</sup>.

68 A potential concern of coronavirus vaccines is that they may predispose for disease enhancement  
69 after breakthrough infection, by eliciting only low- or non-neutralizing antibodies in combination  
70 with a Th2 skewed cellular response<sup>14,23–25</sup>. Vaccine-associated enhanced respiratory disease  
71 (VAERD) has been described for vaccine candidates for SARS-CoV and MERS-CoV but only in  
72 some animal models<sup>26–30</sup>. No human studies for these coronavirus vaccines have been reported that  
73 would allow a confirmation of the predictive value of these animal models. To our knowledge,  
74 there is no evidence of VAERD in nonclinical studies with SARS-CoV-2 vaccines available to  
75 date. Furthermore, clinical studies with SARS-CoV-2 vaccines, including the large-scale Phase 3  
76 studies that are currently ongoing, have so far not reported any VAERD events.

77 The Ad26 vaccine vector is being used in a licensed Ebola virus vaccine<sup>31,32</sup> and in multiple  
78 candidate vaccine programs, and has uniformly induced potently neutralizing antibody- and  
79 cellular immune responses with a clear Th1 skewing in non-clinical and clinical studies<sup>33–36</sup>.  
80 Similarly, Ad26.COVS induced neutralizing antibodies and a Th1 skewed cellular immune  
81 response in mice<sup>4</sup>, NHP<sup>2</sup> and humans<sup>5</sup>, however, additional animal studies at suboptimal immunity  
82 to allow breakthrough infection are considered important to address the potential risk of  
83 predisposition for VAERD by Ad26.COVS.

84 Here we established an additional SARS-CoV-2 hamster challenge model and utilized it to confirm  
85 immunogenicity of Ad26.COVS and to verify its protective efficacy against intranasal infection  
86 with a heterologous G614 spike variant of SARS-CoV-2 (BetaCoV/Munich/BavPat1/2020).  
87 Furthermore, we established immunogenicity and efficacy of 2-dose Ad26.COVS regimens,  
88 confirmed correlates of protection and assessed VAERD by monitoring clinical, virological and

- 89 histopathological signs of disease enhancements in hamsters receiving a sub-optimal dose of
- 90 Ad26.COV2.S that did not protect against viral replication upon SARS-CoV-2 challenge.

## 91 **RESULTS**

### 92 *Establishment of a G614 spike variant SARS-CoV-2 Syrian hamster challenge model.*

93 To assess vaccine immunogenicity, efficacy, and VAERD in hamsters, we established an Syrian  
94 hamster challenge model based on a SARS-CoV-2 strain with the D614G substitution in the spike  
95 protein. Male animals (n=12 per inoculation dose level) were inoculated with SARS-CoV-2  
96 BetaCoV/Munich/BavPat1/2020 (containing a D614G substitution in the S1 fragment) at dose  
97 levels  $10^2$ ,  $10^{3.3}$ ,  $10^{4.6}$  and  $10^{5.9}$  50% tissue culture infective dose (TCID<sub>50</sub>) administered by the  
98 intranasal route. Daily throat swabs were taken, and necropsies were performed 2, 3, 4, and 7 days  
99 post inoculation (dpi) (n=3 per timepoint), to monitor viral load in throat swabs, in lung and nose  
100 tissue, and to study respiratory tract pathology. As shown in Fig 1A and B, lung and nose tissue  
101 viral load assessment revealed high titers of replication-competent virus as measured by TCID<sub>50</sub>  
102 in all inoculated animals at two dpi, independent of the size of the inoculum. The observed lung  
103 and nose viral load kinetics after two dpi were comparable across all tested inoculum quantities.  
104 Hamsters inoculated with  $10^{3.3}$ ,  $10^{4.6}$  and  $10^{5.9}$  TCID<sub>50</sub> showed highest viral loads in throat swabs  
105 at one dpi (Fig 1C), after which viral loads decreased to below the limit of detection by 4 to 5 dpi.  
106 By contrast, inoculation with the lowest SARS-CoV-2 dose of  $10^2$  TCID<sub>50</sub> resulted in an increase  
107 in infectious viral load in throat swabs from 1 to 2 dpi, suggesting viral replication, after which the  
108 viral load decreased to below the limit of detection by day 4 post inoculation.

109 Histological analysis after challenge with  $10^2$  TCID<sub>50</sub> showed abundant presence of SARS-CoV-  
110 2 nucleocapsid protein (SARS-CoV-2 NP) by immunohistochemistry in areas of severe  
111 inflammation, characterized by multifocal moderate to severe degeneration and necrosis of upper  
112 and lower respiratory tract epithelial cells (Supp Fig 1). Compared with the higher challenge doses,  
113  $10^2$  TCID<sub>50</sub> induced a comparable extent and severity of inflammation and damage throughout the

114 respiratory tract, as determined by blinded semi-quantitative scoring (Fig 1D and E), with  
115 marginally lower lung histopathology scores at lower dose levels. Taken together, these results  
116 demonstrate that a low dose challenge inoculum induced a comparable viral load and disease  
117 pathology compared with higher viral dose challenges. For subsequent experiments we selected a  
118  $10^2$  TCID<sub>50</sub> challenge dose associated with moderate disease based on histopathology findings, to  
119 allow assessment of the occurrence of more severe disease in this model and a theoretical risk for  
120 VAERD could be addressed. A 4-day follow up time after challenge was chosen as the most  
121 optimal time point to simultaneously evaluate lung tissue viral load and histopathology.

#### 122 *Immunogenicity of Ad26.COV2.S in Syrian hamsters.*

123 Immunogenicity and protective efficacy of our Ad26.COV2.S vaccine candidate was assessed in  
124 the newly established challenge model described above. For comparison, two prototype Ad26  
125 based vaccines were used expressing a membrane bound full length wild-type spike protein  
126 (Ad26.S) or a soluble pre-fusion stabilized spike protein with a C-terminal foldon replacing its  
127 transmembrane domain (Ad26.dTM.PP)<sup>2-4</sup>. Male hamsters were immunized with either  $10^9$  or  
128  $10^{10}$  viral particles (VPs) of Ad26.COV2.S and the two prototype vaccines. For each dose level,  
129 immunogenicity was assessed at various timepoints after a single immunization, and after a second  
130 homologous dose given 4 weeks later. Animals were challenged 4 weeks after one or two  
131 immunizations (Fig 2A). At week 4, Ad26.COV2.S elicited the highest neutralizing antibody titers  
132 and frequency of responding animals across dose levels (median titer  $10^9$  VP 22.6,  $10^{10}$  VP 38.6;  
133 12/12 responders) compared with Ad26.S (median titer  $10^9$  VP 8.5,  $10^{10}$  VP 9.7; 8/12 responders,  
134  $p < 0.001$ ) and Ad26.dTM.PP (median titer  $10^9$  VP 8.5,  $10^{10}$  VP 16.0; 8/12 responders,  $p < 0.001$ )  
135 (Fig 2B). A second dose, irrespective of vaccine used, increased neutralization titers (week 8; Fig  
136 2C). The Ad26.COV2.S vaccine was most immunogenic also after two doses, with a median



137 neutralization titer of 128 after two doses of  $10^9$  VP and 219 after two doses of  $10^{10}$  VP, compared  
138 with neutralization titers of 32 and 55 for Ad26.S ( $p=0.003$ ), and 16 and 61 for A26.dTM.PP  
139 ( $p=0.002$ ), respectively.

140 Binding antibodies measured by an enzyme-linked immunosorbent assay (ELISA) showed the  
141 same differences between Ad26.COVS2.S and the two prototype vaccines (Supp Fig 2). However,  
142 a second dose at week 4 only transiently increased the median binding antibody titers at week 5.  
143 Antibody titers subsequently declined and at week 8 were comparable to levels observed prior to  
144 dose 2 at week 4 or lower.

145 We confirmed the immunogenicity of Ad26.COVS2.S and the two prototype vaccines and the  
146 benefit of a second dose in rabbits (New Zealand white rabbits, female), in a 2-dose regimen using  
147 an 8-week interval, an interval that is also being evaluated in clinical studies<sup>5</sup>. Vaccines were tested  
148 at a dose level of,  $5 \times 10^9$  and  $5 \times 10^{10}$  VPs, of which the latter represents the human dose used in  
149 phase 3 clinical trials<sup>5</sup>. All tested vaccines elicited binding and neutralizing antibody titers as early  
150 as 2 weeks after the 1<sup>st</sup> dose (no samples were collected earlier after immunization) with  
151 Ad26.COVS2.S again inducing higher antibody titers compared to both Ad26.S and Ad26.dTM.PP  
152 (Supp Fig 3A and B). A second homologous dose at week 8 significantly boosted the binding and  
153 neutralizing antibody titers at week 10 (2 weeks post second dose) when compared across dose to  
154 pre-second dose levels ( $p<0.001$ ).

155 *Protective efficacy of Ad26.COVS2.S against SARS-CoV-2 challenge in Syrian hamsters.*

156 Next, we studied the protective efficacy of Ad26.COVS2.S and the two prototype vaccines  
157 administered as 1- or 2- dose regimens followed by an intranasal inoculation with  $10^2$  TCID<sub>50</sub> of  
158 SARS-CoV-2 G614 virus 4 weeks after the last dose i.e., at week 4 for the 1-dose regiment and at

159 week 8 for the 2-dose regimen in Syrian hamsters. At 4 days post inoculation (dpi), animals were  
160 sacrificed, and lungs, nasal turbinates and throat swabs were analyzed for viral load and  
161 pathological changes. To increase the power of the statistical analysis and since we did not observe  
162 a pronounced dose responsiveness for the virology readouts, we pooled viral load readouts for  
163 comparison to the Ad26.Empty control group. Comparisons between the three different vaccines  
164 (Ad26.COV2S, Ad26.S, Ad26.dTM.PP) were conducted across dose levels.

165 After a single vaccination and subsequent challenge, median lung viral load in all vaccine groups  
166 was significantly lower compared with the Ad26.Empty control group (median viral load  $10^{7.3}$   
167 TCID<sub>50</sub>/g) (Fig 3A). Virus was detected in the lungs of 11 out of 12 animals immunized with a  
168 single dose of Ad26.S (median viral load  $10^9$  VP  $10^{5.6}$  TCID<sub>50</sub>/g,  $10^{10}$  VP  $10^5$  TCID<sub>50</sub>/g), and in  
169 10 out of 12 animals immunized with a single dose of A26.dTM.PP (median viral load  $10^9$  VP  
170  $10^{5.3}$  TCID<sub>50</sub>/g,  $10^{10}$  VP  $10^{5.7}$  TCID<sub>50</sub>/g) and no clear effect of vaccine dose was observed. By  
171 contrast, only 3 out of 12 animals immunized with a single dose of Ad26.COV2.S had detectable  
172 virus in the lung (median viral load of  $10^9$  VP and  $10^{10}$  VP  $10^{1.2}$  TCID<sub>50</sub>/g). Of hamsters vaccinated  
173 with a second dose of Ad26.COV2.S, again 3 out of 12 animals had detectable viral load for both  
174 vaccine dose levels, suggesting no added value of the second dose. Viral load in the animals with  
175 breakthrough infections were also similar to the viral load in animals with breakthrough infections  
176 after one vaccination. A second dose of  $10^9$  VP Ad26.S or Ad26.dTM.PP also had little impact on  
177 the lung infection rate post challenge at week 8 (5 out of 6 animals showed detectable viral load  
178 per vaccine, median titer  $10^{4.9}$  TCID<sub>50</sub>/g and  $10^{6.7}$  TCID<sub>50</sub>/g, respectively ) but a second dose of  
179  $10^{10}$  VP of these prototype vaccines was associated with a lower lung infection rate and median  
180 lung viral loads compared with the 1-dose regimens (median titer  $10^2$  TCID<sub>50</sub>/g and  $10^4$  TCID<sub>50</sub>/g,  
181 respectively), suggesting a benefit of a 2 dose regimen (Fig 3B).

182 To determine the impact of the vaccines on viral load in the upper respiratory tract, nasal turbinate  
183 viral load was determined after sacrifice at 4 dpi, and throat swab viral load was determined daily  
184 after infection and was analyzed as area under the curve (AUC) per animal up to day 4 post  
185 infection. In animals receiving a single vaccine dose, a limited but statistically significant reduction  
186 in nasal turbinate viral load after challenge was observed for Ad26.dTM.PP but not for  
187 Ad26.COVS.S and Ad26.S compared with the control group. After 2 vaccine doses, all three  
188 vaccines induced a significant reduction in nasal turbinate viral load post challenge compared with  
189 the Ad26.Empty group (Fig 3C and D). By contrast, throat swab viral load data show that none of  
190 the vaccines reduced viral burden in the throat after single immunization and subsequent  
191 inoculation with SARS-CoV-2 (Fig 3E), and only animals immunized with two doses  
192 Ad26.COVS.S had significantly reduced throat viral load compared to control (Fig 3F).

193 The observed protective efficacy results are further supported by immunohistochemistry (IHC)  
194 staining for SARS-CoV-2 NP in the lung and nose tissue, and by histopathology (Supp Fig 4 and  
195 5). Lung and nose IHC and histopathology scores were overall consistent with viral load data, with  
196 lower median scores in the lungs of immunized groups compared with the Ad26.Empty group  
197 (Supp Fig 4, table 1) and no significant difference in the IHC and histopathology scores in nose  
198 tissues of vaccinated animals compared with the Ad26.empty control group independent of vaccine  
199 regimen (Supp Fig 5, table 1).

200 *Syrian hamsters immunized with sub-optimal dose levels Ad26.COVS.S do not show signs of*  
201 *VAERD after SARS-CoV-2 inoculation and breakthrough infection.*

202 Based on the observed immunogenicity and efficacy, Ad26.COVS.S was selected for further  
203 evaluation in a dose titration study to address the theoretical risk of VAERD under conditions of  
204 suboptimal immune responses allowing breakthrough infection after SARS-CoV-2 challenge.

205 Groups of hamsters were immunized with a single dose of Ad26.COV2.S at  $10^7$ ,  $10^8$ ,  $10^9$  or  $10^{10}$   
206 VP (4 groups; n=8/group). The control group received  $10^{10}$  VP of a control vaccine encoding an  
207 irrelevant antigen (Ad26.Irr). At 4 weeks post immunization we observed a clear dose response of  
208 binding and neutralizing antibodies, both in number of responding animals and in antibody titers,  
209 with no detectable binding or neutralizing antibody titers in 1 or 3 out of 8 animals at the lowest  
210 dose level of  $10^7$  VP (Fig 4A and B), respectively. For the  $10^9$  and  $10^{10}$  VP doses, median levels  
211 of binding antibodies (median endpoint titer of  $10^{3.7}$  and  $10^{3.9}$ , respectively) and median  
212 neutralizing antibody responses (median neutralization titers of 45 and 91, respectively) were  
213 consistent with observations in the previous study. Four weeks after immunization, hamsters were  
214 inoculated with  $10^2$  TCID<sub>50</sub> SARS-CoV-2 followed by determination of efficacy and  
215 histopathology readouts as in the previous study. Animals dosed with  $10^9$  and  $10^{10}$  VP of  
216 Ad26.COV2.S showed similar frequencies of breakthrough lung infection as the comparable  
217 groups in the previous study (Fig 3A), with 3 out of 8 and 2 out of 8 animals with detectable lung  
218 viral load in the dose titration study, respectively (Fig 4C). Despite the increase in the number of  
219 animals that had breakthrough infections at lower Ad26.COV2.S dose levels (6 out of 8 animals  
220 that received  $10^8$  VP and 8 out of 8 that received  $10^7$  VP), the median lung viral load titers (median  
221 of  $10^{4.8}$  TCID<sub>50</sub>/g at  $10^8$  VP, median of  $10^5$  TCID<sub>50</sub>/g at  $10^7$  VP) and IHC staining of SARS-CoV-  
222 2 NP in these groups (median scores 1) were lower than in the control group (median lung viral  
223 load  $10^{6.8}$  TCID<sub>50</sub>/g and IHC median score 2) (Fig 4C and D). Congruent with lung viral load and  
224 IHC staining results, immunization with  $10^8$ ,  $10^9$  and  $10^{10}$  VP significantly reduced histopathology  
225 in the lower respiratory tract compared with mock-immunized hamsters (Fig 5A). Immunization  
226 with  $10^9$  and  $10^{10}$  VP resulted in absence of any signs of lower respiratory tract histopathology in  
227 4 out of 8 and 3 out of 8 hamsters, respectively. Notably, despite detectable breakthrough lung

228 infection in all hamsters dosed with  $10^7$  VP and in most hamsters immunized with  $10^8$  VP, median  
229 lower respiratory tract histopathology scores were lower when compared with the mock  
230 immunized group (Ad26.irr, Table 2).

231 The inflammation score of nasal tissue (rhinitis) showed no significant differences between  
232 vaccinated and control groups (Fig 5B). Collectively, these data demonstrate that the presence of  
233 low levels of neutralizing antibodies elicited by sub-optimal Ad26.COVS vaccine dose levels do  
234 not aggravate lung disease in challenged Syrian hamsters when compared to a mock vaccine.

235 *Binding and neutralizing antibodies correlate with protection.*

236 To determine putative correlates of protection, binding and neutralizing antibody titers from  
237 different regimens and dose levels were pooled for Ad26.COVS (N=56) and compared between  
238 protected and unprotected animals (Fig 6). Protection from SARS-CoV-2 infection was defined as  
239 a lung viral load below  $10^2$  TCID<sub>50</sub>/g, based on the observation that only few animals with detectable  
240 viral load fall below this margin, which was likely related to variation in the available sample  
241 quantity per animal (Fig 3A and B, and Fig 4C). Protected animals dosed with Ad26.COVS had  
242 significantly (2.3-fold) higher median binding antibody titers than unprotected animals ( $p < 0.001$ ,  
243 two sample t-test) (Fig 6A). Similar results were observed for an analogous analysis of median  
244 neutralizing antibody titers, which were also significantly (4-fold) increased in animals immunized  
245 with Ad26.COVS with undetectable lung viral load compared with unprotected animals  
246 ( $p < 0.001$ , two sample t-test) (Fig 6B).

247 To gain a more quantitative understanding of the relationship between immune response levels  
248 and protection outcome, we built logistic regression models with Firth's correction (Fig 6C).  
249 Hamsters were classified either as infected or protected from SARS-CoV-2, as defined above.

250 Binding antibody titers correlated significantly with protection ( $p=0.0004$ ), with endpoint titers  
251 above  $10^{3.6}$  appearing to be linked with protection from lung infection. Also a comparably  
252 significant slope ( $p=0.0002$ ) was observed with neutralizing antibody titers where titers above 32  
253 appeared to be linked with protection outcome in the majority of animals.

## 254 **DISCUSSION**

255 In a previous study using an early SARS-CoV-2 isolate we have demonstrated that immune  
256 responses elicited by a single dose of Ad26.COVS2.S could reduce viral load and protected  
257 hamsters from severe clinical disease<sup>3</sup>. However, during the ongoing SARS-CoV-2 pandemic, a  
258 virus variant with a D614G substitution in the spike protein has emerged<sup>16</sup>. This mutation has been  
259 associated with increased viral fitness and enhanced infectivity and has now become the dominant  
260 variant in large parts of the world<sup>16</sup>, although likely to be replaced over time by new variants that  
261 are constantly emerging. In Syrian hamsters, it was confirmed that infection with the D614G  
262 variant was associated with higher infectious viral titers in the upper respiratory tract but not in the  
263 lungs<sup>21</sup>. Here we describe the establishment of a hamster challenge model of moderate disease  
264 using a SARS-CoV-2 strain containing the prevalent D614G substitution. We used this model to  
265 test the protective efficacy of immune responses elicited by our COVID-19 vaccine candidate  
266 Ad26.COVS2.S and two Ad26-based prototype vaccines that encode different SARS-CoV-2 spike  
267 designs. Our study demonstrates that the disease progression in this hamster challenge model  
268 shows features of a moderate disease course in humans with clear histopathological lung disease  
269 which was only marginally exacerbated by a larger inoculum dose. Peak lung viral load was not  
270 affected by a lower inoculum dose, suggesting infection of the majority of primary susceptible  
271 lung cells, leading to peak lung viral load at day 2 post inoculation. In line with our previous studies  
272 in vaccinated and challenged NHPs and hamsters, Ad26.COVS2.S vaccination reduced viral

273 replication in lungs by 6 log<sub>10</sub> below the level observed in control animals with many animals that  
274 received higher vaccine doses showing undetectable viral replication. Ad26.COVS significantly  
275 outperformed the two prototype vaccines, both for immunogenicity as for protective efficacy. Our  
276 published data<sup>3,37</sup> in combination with our present study indicate that Ad26.COVS-elicited  
277 immune responses give adequate protection against SARS-CoV-2 variants with and without the  
278 D614G spike substitution.

279 We extended previous studies by evaluation of a second homologous vaccine dose with a 4 week  
280 interval, which only moderately increased binding antibody levels, while neutralizing antibody  
281 titers were substantially boosted. This contrasts observations in NHP, where a second vaccine dose  
282 significantly boosted both neutralizing and binding antibody levels<sup>38</sup>. Possible explanations  
283 include limited translatability of dose levels between hamsters and NHP, differential impact of  
284 anti-Ad26 vector responses elicited by the first dose on the immunogenicity of a second  
285 homologous dose between species, and that a shorter interval of 4 weeks between immunizations  
286 compared with 8 weeks can reduce the impact of a second dose, as previously observed in NHP<sup>37</sup>.  
287 In addition, the high binding antibody levels induced by a single immunization in hamsters might  
288 represent saturating levels while neutralizing antibodies could still increase after a second dose,  
289 possibly reflecting extended affinity maturation. The advantage of a second homologous vaccine  
290 dose for humoral SARS-CoV-2 S-specific immune responses was also observed in rabbits  
291 immunized with the same Ad26-based vaccines and confirm our clinical data (Sadoff, le Gars,  
292 NEJM in press). Whether a 2-dose regimen is also preferred for improved vaccine efficacy remains  
293 to be seen.

294 Interestingly, a second dose of Ad26.S or Ad26.dTM.PP increased protection against lung viral  
295 load after challenge compared with the low protection achieved by a single vaccination of hamsters

296 with these prototype vaccines. In contrast, a second dose of Ad26.COV2.S did not further increase  
297 the already high level of efficacy established by a single dose. This is supported by our correlate  
298 analysis where the probability of protection increases with a higher antibody titer, and if a certain  
299 antibody titer is reached, protection probability increases only moderately. The correlation of lung  
300 protection with serum binding- and neutralizing antibody levels, as observed here in the Syrian  
301 hamster SARS-CoV-2-D614G challenge study, confirms our data in NHP<sup>2</sup> and was irrespective  
302 of vaccine, dose level or regimen.

303 In addition to protection from COVID-19, vaccine-elicited immunity ideally also protects against  
304 asymptomatic infection as well as against transmission of virus by reduction of viral load in the  
305 upper respiratory tract. In the hamster challenge model used here we observed high replication-  
306 competent virus levels in the nasal turbinates despite the low virus inoculum dose used, which is  
307 in line with the observation that the spike D614G substitution increases SARS-CoV-2 infectivity  
308 in the upper respiratory tract of challenged hamsters<sup>21</sup>. As the size of the challenge inoculum is  
309 low it is unlikely that the high viral load in nasal turbinates detected 4 days later are derived from  
310 the original inoculum. Viral load reduction in nose tissue required two vaccine doses, irrespective  
311 of the vaccine used. Two doses of Ad26.COV2.S was the only regimen that also decreased viral  
312 titers in throat swabs. Reduction of viral load in the upper respiratory tract was limited compared  
313 to the lower respiratory tract which is in contrast to our NHP studies where we observed almost  
314 complete reduction of nasal viral load. This may be explained by a difference in the susceptibility  
315 of the nasal epithelium for viral infection<sup>41,42</sup>, or the potentially different composition of immune  
316 cells present in the respiratory tract between hamsters and primates and different induction of local  
317 upper respiratory tract immunity by vaccine candidates in general or by Ad26-based vaccines



318 specifically. Whether Ad26.COV2.S-elicited immunity can protect against asymptomatic  
319 infection and SARS-CoV-2 transmission remains to be determined.

320 Previous studies in preclinical models with candidate coronavirus vaccines against SARS-CoV  
321 and MERS indicated that disease can be exacerbated upon infection by certain vaccine-elicited  
322 immune responses<sup>43</sup>. However, neither VAERD nor antibody-mediated disease enhancement have  
323 been reported following vaccination with SARS-CoV-2 vaccine candidates in pre-clinical animal  
324 models, nor in ongoing clinical studies including efficacy reports of phase 3 studies of mRNA-  
325 and other adenoviral vector-based or whole inactivated virus vaccines. Nevertheless, vaccine  
326 efficacy in clinical studies was high so far and the theoretical potential for VAERD requires further  
327 investigation especially in the setting of suboptimal or waning vaccine-induced immunity. We  
328 therefore assessed the potential for Ad26.COV2.S to predispose for VAERD in a setting where  
329 levels of vaccine-induced antibodies were too low to prevent viral replication in the lung by  
330 immunizing with suboptimal Ad26.COV2.S doses. Importantly, even in the setting of inadequate  
331 immune responses for the prevention of lung viral replication, the lower respiratory tract  
332 histopathology scores of immunized animals showed no signs of VAERD when compared to the  
333 control group. Conversely, most vaccinated animals with breakthrough infection still showed  
334 reduced histopathology compared with control animals. These results imply that the theoretical  
335 risk that Ad26.COV2.S would predispose for VAERD is minimal.

336 Our study confirms that our Ad26.COV2.S vaccine candidate is highly immunogenic, and can  
337 protect hamsters against challenge with a SARS-CoV-2 G614 spike variant virus. The excellent  
338 potency of Ad26.COV2.S and the absence of data that it would predispose for VAERD, supports  
339 its continuous evaluation in the ongoing Phase 3 clinical trials in a single and a two-dose regimen  
340 (NCT04505722 and NCT04614948, respectively).

341

## 342 **MATERIALS AND METHODS**

### 343 **Vaccines**

344 The Ad26-based vaccines were generated as previously described<sup>4</sup>. Briefly, they are based on a  
345 replication incompetent adenovirus serotype 26 (Ad26) vector encoding a prefusion stabilized  
346 SARS-COV-2 spike protein sequence (Wuhan Hu1; GenBank accession number: MN908947).  
347 Replication-incompetent, E1/E3-deleted Ad26-vectors were engineered using the AdVac  
348 system<sup>44</sup>, using a single plasmid technology containing the Ad26 vector genome including a  
349 transgene expression cassette. The codon optimized, prefusion stabilized, SARS-COV-2 spike  
350 protein encoding gene was inserted into the E1-position of the Ad26 vector genome.  
351 Manufacturing of the Ad26 vectors was performed in the complementing cell line PER.C6 TetR  
352 <sup>45,46</sup>. The negative control vector Ad26.Irr (RSV-FA2-2A-GLuc) encodes the RSV F protein fused  
353 to Gaussia firefly luciferase as a single transgene separated by a 2A peptide sequence, resulting in  
354 expression of both individual proteins. Manufacturing of the vector was performed in Per.C6.  
355 Adenoviral vectors were tested for bioburden and endotoxin levels prior to use.

### 356 **Study design animal experiments**

#### 357 Hamster studies

358 Animal experiments were approved by the Central Authority for Scientific Procedures on Animals  
359 (Centrale Commissie Dierproeven) and conducted in accordance with the European guidelines  
360 (EU directive on animal testing 86/609/EEC) and local Dutch legislation on animal experiments.  
361 The in-life phase took place at Viroclinics Biosciences BV, Viroclinics Xplore, Schaijk, the  
362 Netherlands. All Viroclinics personnel involved in performing the clinical observations and  
363 laboratory analysis in which interpretation of the data was required were not aware of the

364 Treatment Allocation Key at any time prior to completion of the study and were blinded by  
365 allocating a unique sample number to each sample collected and analysis.  
366 Male Syrian (golden) hamsters (*Mesocricetus auratus*), strain HsdHan:AURA, aged 9-11 weeks  
367 at the start of the study were purchased from Envigo (Envigo RMS B.V., Venray, the Netherland).  
368 Hamsters were immunized via the intramuscular route with 100µl vaccine (50µl per hind leg)  
369 under isoflurane anesthesia. Hamsters were intranasally inoculated with 100µl containing 10<sup>2</sup>  
370 TCID<sub>50</sub> of SARS-CoV-2 (BetaCoV/Munich/BavPat1/2020, containing a D614G substitution in  
371 the S1 fragment, kindly provided by Dr. C. Drosten). The sequence of the challenge stock has been  
372 characterized and has been shown to be in line with the parental strain (data not shown). On the  
373 day of infection, prior to inoculation, and daily until four days post infection throat swabs were  
374 collected under isoflurane anesthesia. Throat swabs were collected in virus transport medium,  
375 aliquoted and stored until time of analysis. Intermediate blood samples were collected via the retro-  
376 orbital bleeding route under isoflurane anesthesia. Blood was processed for serum isolation. At the  
377 end of the experiment, under anesthesia, animals were sacrificed by cervical dislocation and  
378 necropsy was performed. Respiratory tissues collected after necropsy were analyzed for viral load,  
379 and for histopathological changes.

380

### 381 Rabbit studies

382 Rabbit experiments were approved by the local animal welfare body and conducted in concordance  
383 with European guidelines (EU directive on the protection of animals used for scientific purposes  
384 2010/63/EU) and local Belgian legislation on animal experiments. The in-life phase took place at  
385 the non-clinical safety Beerse site of Janssen Research and Development, an AAALAC-approved  
386 laboratory. Female New Zealand White rabbits, aged approximately 4 months at the start of the

387 study were purchased from Charles River Laboratories in France. Rabbits were immunized in  
388 week 0 and week 8 of the study with  $5 \times 10^9$  or  $5 \times 10^{10}$  vp Ad26.S, Ad26.dTM.PP or Ad26.COV2.S  
389 in a volume of 0.5 mL via the intramuscular route. As a control group, five rabbits were immunized  
390 with saline. Interim blood samples for serum processing were collected via the lateral vein in the  
391 ear. At the end of the experiment, animals were sacrificed by intravenous injection of  
392 Sodiumpentobarbital, followed by exsanguination via the femoral artery.

### 393 **Detection of infectious viral load by TCID<sub>50</sub> assay**

394 Quadruplicate 10-fold serial dilutions were used to determine the TCID<sub>50</sub> virus titers in confluent  
395 layers of Vero E6 cells. To this end, serial dilutions of the samples (throat swabs, and tissue  
396 homogenates) were made and incubated on Vero E6 monolayers for 1 hour at 37 °C. Vero E6  
397 monolayers are washed and incubated for 5-6 days at 37 degrees after which plates are scored  
398 using the vitality marker WST-8 (colorimetric cell counting kit, Sigma Aldrich, cat 96992-  
399 3000TESTS-F). To this end, WST-8 stock solution was prepared and added to the plates. Per well,  
400 20 µL of this solution (containing 4 µL of the ready-to-use WST-8 solution from the kit and 16  
401 µL infection medium, 1:5 dilution) was added and incubated 3-5 hours at room temperature.  
402 Subsequently, plates were measured for optical density at 450 nm (OD450) using a micro plate  
403 reader and visual results of the positive controls (cytopathic effect (cpe)) were used to set the limits  
404 of the WST-8 staining (OD value associated with cpe). Viral titers (TCID<sub>50</sub>) were calculated using  
405 the method of Spearman-Kärber.

### 406 **Histopathology**

407 Histopathology was assessed by a pathologist from Viroclinics Biosciences BV, Viroclinics  
408 Xplore, and a pathologist from Janssen Non-Clinical Safety (Beerse, Belgium).

409 Four days p.i. all animals were autopsied by opening the thoracic and abdominal cavities and  
410 examining all major organs. The extent of pulmonary consolidation was assessed based on visual  
411 estimation of the percentage of affected lung tissue. The left nasal turbinates, trachea and left lung  
412 were collected for histopathological examination and analysis by IHC. All tissues were gently  
413 instilled with, and/or immersed in 10% neutral-buffered formalin for fixation. Lungs and trachea  
414 were routinely processed, paraffin wax embedded, micro-sectioned to 3  $\mu$ m on glass slides and  
415 stained with haematoxylin and eosin (H&E) for histopathological evaluation. The sampled and  
416 fixed nasal turbinates were processed after decalcification and embedded into paraffin blocks, and  
417 similarly cut and stained. The H&E stained tissue sections were examined by light microscopy for  
418 histopathology scoring, as well as for the presence of any other lesions. The severity of  
419 inflammatory cell infiltration in nasal turbinates and tracheas was scored for rhinitis and tracheitis:  
420 0 = no inflammatory cells, 1 = few inflammatory cells, 2 = moderate number of inflammatory  
421 cells, 3 = many inflammatory cells.

422 For lung tissue, each entire slide was examined and scored for presence or absence of alveolar  
423 edema, alveolar hemorrhage and type II pneumocyte hyperplasia (0 = no, 1 = yes). The degree and  
424 severity of inflammatory cell infiltration and damage in alveoli, bronchi/bronchioles were scored  
425 for alveolitis and bronchitis/bronchiolitis: 0 = no inflammatory cells, 1 = few inflammatory cells,  
426 2 = moderate number of inflammatory cells, 3 = many inflammatory cells. Extent of  
427 peribronchial/perivascular cuffing: 0 = none, 1 = 1-2 cells thick, 2 = 3-10 cells thick, 3 = over 10  
428 cells thick. Additionally, the extent of alveolitis/alveolar damage was scored per slide: 0 = 0%, 1  
429 = <25%, 2 = 25-50%, 3 = >50%.

430 The cumulative score (sum) for the extent and severity of inflammation of lung tissues provided  
431 the total lower respiratory tract (LRT) score, with a possible maximum score of 24. The following

432 histopathology parameters were included in the sum of lower respiratory tract disease parameters:  
433 alveolitis, alveolar damage, alveolar edema, alveolar hemorrhage, type II pneumocyte hyperplasia,  
434 bronchitis, bronchiolitis, peribronchial and perivascular cuffing.

435

### 436 **Immunohistochemistry**

437 Lung, nose and trachea tissue samples were sampled, fixed in 10% formalin (lung instilled) for 14  
438 days and were embedded in paraffin by Viroclinics Biosciences B.V. Tissue blocks were delivered  
439 and assessed by a pathologist from Janssen Non-clinical Safety (Beerse, Belgium).

440 Paraffin sections of lung, trachea and nose sections of all animals were automatically stained  
441 (Ventana Discovery Ultra, Roche, France), using rabbit polyclonal anti-SARS-CoV Nucleocapsid  
442 protein antibody (NP, Novus NB100-56576, 1/300) which is cross reactive towards SARS-CoV-  
443 2 NP. These sections were semi-quantitatively scored for number of SARS-CoV-2 NP positive  
444 cells, and graded as 0: no positive immunoreactive cells, 1: minimal (few/focal) number of positive  
445 cells, 2 moderate (focal/multifocal) number of positive cells and 3: many/high (focally  
446 extensive/multifocal) number of immunoreactive cells.

447

### 448 **Virus Neutralization Assay**

449 Neutralization assays against live SARS-CoV-2 were performed using the microneutralization  
450 assay previously described by Algaissi and Hashem<sup>47</sup>. Vero E6 cells [CRL-1580, American Type  
451 Culture Collection (ATCC)] were grown in Eagle's minimal essential medium (EMEM; Lonza)  
452 supplemented with 8% fetal calf serum (FCS; Bodinco BV), 1% penicillin-streptomycin (Sigma-  
453 Aldrich, P4458) and 2 mM L-glutamine (PAA). Cells were maintained at 37°C in a humidified  
454 atmosphere containing 5% CO<sub>2</sub>. Clinical isolate SARS-CoV-2/human/NLD/Leiden-0008/2020

455 (Leiden L-0008) was isolated from a nasopharyngeal sample and its characterization will be  
456 described elsewhere (manuscript in preparation). Isolate Leiden-0008 was propagated and titrated  
457 in Vero E6 cells using the TCID<sub>50</sub> endpoint dilution method. The next-generation sequencing  
458 derived sequence of this virus isolate is available under GenBank accession number MT705206  
459 and shows 1 mutation in the Leiden-0008 virus spike protein compared to the Wuhan spike protein  
460 sequence resulting in Asp>Gly at position 614 (D614G) of the Spike protein. In addition, several  
461 non-silent (C12846U and C18928U) and silent mutations (C241U, C3037U and C1448U) in other  
462 genes were found. The TCID<sub>50</sub> was calculated by the Spearman-Kärber algorithm as described<sup>48</sup>.  
463 All work with live SARS-CoV-2 was performed in a biosafety level 3 facility at Leiden University  
464 Medical Center.

465 Vero-E6 cells were seeded at 12,000 cells/well in 96-well tissue culture plates 1 day prior to  
466 infection. Heat-inactivated (30 min at 56°C) serum samples were analyzed in duplicate. The panel  
467 of sera were 2-fold serially diluted in duplicate, with an initial dilution of 1:10 and a final dilution  
468 of 1:1280 in 60 µL EMEM medium supplemented with penicillin, streptomycin, 2 mM L-  
469 glutamine and 2% FCS. Diluted sera were mixed with equal volumes of 120 TCID<sub>50</sub>/60 µL Leiden  
470 -0008 virus and incubated for 1 h at 37 °C. The virus-serum mixtures were then added onto Vero-  
471 E6 cell monolayers and incubated at 37 °C. Cells either unexposed to the virus or mixed with 120  
472 TCID<sub>50</sub>/60 µL SARS-CoV-2 were used as negative (uninfected) and positive (infected) controls,  
473 respectively. At 3 days post-infection, cells were fixed and inactivated with 40 µL 37%  
474 formaldehyde/PBS solution/well overnight at 4 °C. The fixative was removed from cells and the  
475 clusters were stained with 50 µL/well crystal violet solution, incubated for 10 minutes and rinsed  
476 with water. Dried plates were evaluated for viral cytopathic effect. Neutralization titer was  
477 calculated by dividing the number of positive wells with complete inhibition of the virus-induced

478 cytopathogenic effect, by the number of replicates, and adding 2.5 to stabilize the calculated ratio.  
479 The neutralizing antibody titer was defined as the log<sub>2</sub> reciprocal of this value. A SARS-CoV-2  
480 back-titration was included with each assay run to confirm that the dose of the used inoculum was  
481 within the acceptable range of 30 to 300 TCID<sub>50</sub>.

482

### 483 **ELISA**

484 IgG binding to SARS-CoV-2 Spike antigen was measured by ELISA with an in-house produced  
485 COR200099 and COR200153 are SARS-CoV-2 spike proteins based on the Wuhan-Hu-1 SARS-  
486 CoV-2 strain (MN908947) and stabilized by two point mutations (R682A, R685G) in the S1/S2  
487 junction that knock out the furin cleavage site, and by two introduced prolines (K986P, V987P) in  
488 the hinge region in S2. In addition, the transmembrane and cytoplasmic regions have been replaced  
489 by a foldon domain for trimerization, allowing the proteins to be produced as soluble proteins.  
490 COR200153 additionally contains an A942P mutation, which increases trimer expression and a C-  
491 terminal biotin label, which was covalently attached via a sortase A reaction.

492 For the analysis of hamster samples, 96-wells Perkin Elmer white ½ area plates were coated  
493 overnight with protein. For the analysis of rabbit samples, plates were incubated for 2 hours at  
494 37°C for coating. Following incubation, plates were washed, blocked for 1 hour and subsequently  
495 incubated for 1 hour with 3-fold serially diluted serum samples in block buffer in duplicate. After  
496 washing, plates were incubated for 1 hour with Rabbit-Anti-Hamster IgG HRP (Invitrogen,  
497 catalogue number A18895) or anti-rabbit IgG-HRP (Jackson ImmunoResearch) in block buffer,  
498 washed again and developed using ECL substrate. Luminescence readout was performed using a  
499 BioTek Synergy Neo instrument (hamster samples) or on an Envision Multimode plate reader



500 (rabbit samples). Hamster antibody titers are reported as Log<sub>10</sub> endpoint, rabbit titers are reported  
501 as Log<sub>10</sub> relative potency compared to a reference standard.

502

### 503 **Statistical analysis**

504 Statistical differences across dose levels between immunization regimens were evaluated two-  
505 sided for S-specific binding antibodies as measured by ELISA, neutralizing titers as measured by  
506 virus neutralization assay (VNA), viral load as measured by TCID<sub>50</sub>, histopathology and IHC  
507 scores. Across dose levels comparisons between Ad26.S, Ad26.dTM.PP and Ad26.COV2.S  
508 groups were made using the t-test from ANOVA with vaccine and dose as factors for group  
509 comparisons without censored measurements at LLOD or LLOQ, or the z-test from Tobit ANOVA  
510 for group comparisons with at most 50% censored values, or the Cochran-Mantel-Haenszel test  
511 for group comparisons with 50% or more censored values. Results were corrected for multiple  
512 comparisons by 3-fold Bonferroni correction. Exploratory comparisons per dose level, and across  
513 dose level of Ad26.S, Ad26.dTM.PP and Ad26.COV2.S groups with groups immunized with an  
514 irrelevant antigen, Ad26.Empty and Ad26.Irr, were made using the methods above or the Mann-  
515 Whitney U test. Due to the exploratory nature of these analysis, results were not corrected for  
516 multiple comparisons.

517 Statistical analyses were performed using SAS version 9.4 (SAS Institute Inc. Cary, NC, US) and  
518 R version 3.6.1 (2019-07-05). Statistical tests were conducted two-sided at an overall significance  
519 level of  $\alpha = 0.05$ .

### 520 **Correlation analysis**

521 Hamsters were classified either as infected or protected from SARS-CoV-2, defined as a lung viral  
522 load of either above or below 10<sup>2</sup> TCID<sub>50</sub>/g, respectively. From the binding and neutralizing

523 antibody data pooled from different regimens and dose levels of Ad26.COV2.S, logistic regression  
524 models were built with Firth's correction<sup>49</sup>, with protection outcome as the dependent variable,  
525 and the wtVNA and Log<sub>10</sub> transformed ELISA data before inoculation as the independent variable.

526 **Acknowledgements**

527 This project was funded in part by the Department of Health and Human Services Biomedical  
528 Advanced Research and Development Authority (BARDA) under contract  
529 HHS0100201700018C.

530 We thank Susan King, Joanna Bleszynska, Sanne Kroos, Sven Blokland, Ava Sadi and Pascale  
531 Bouchier, all members of the Vaccine Generation team, and Shessy Torres Morales from LUMC,  
532 dept of medical microbiology, for excellent scientific input and technical assistance. We would  
533 like to specially thank our colleagues of the Janssen Non-Clinical Safety (NCS) pathology  
534 laboratory in Beerse, Belgium, who have helped greatly with processing and analyzing all tissue  
535 samples for histological analyses.

536

537 **Author Contributions**

538 J.vdL., S.R.H., E.vH., J.V., M.vH., M.K., E.S., L.dW., K.S., R.Z. and F.W. designed the  
539 experiments and analyzed the data, J.vdL., S.R.H., A.V., H.S., R.Z. and F.W. wrote the paper.  
540 L.D., L.vdF., L.R., J.L., D.B., R.Z. and F.W. contributed to the conception of the work. J.T., J.S.  
541 and L.M. contributed to the design of the experiments and performed the statistical analyses.  
542 E.vH., J.V., Y.C., M.B., K.F.dB., A.I.G., M.vH., T.D., S.M. and L.dW. performed the  
543 experiments and analyzed the data. All authors reviewed, critiqued, provided comments, and  
544 approved the text.  
545

546 **Competing Interests**

547 J.vdL., S.R.H., A.V., L.D., E.vH., J.V., Y.C., M.B., K.F.dB., A.I.G., M.vH., J.T., J.S., L.M.,  
548 L.vdF., L.R., J.L., D.B., H.S., R.Z. and F.W. are employees of Janssen Vaccines & Prevention. All  
549 authors may own stock or stock options in Johnson & Johnson, the parent company of Janssen  
550 Vaccines & Prevention.

551 **Data Availability**

552 All data that support the findings of this study are available from the corresponding author upon

553 reasonable request.

554 **REFERENCES**

- 555 1. John Hopkins University Coronavirus Resource Centre. [cited 2020 Dec 14] Available  
556 from <https://coronavirus.jhu.edu/>.
- 557 2. Mercado, N. B. *et al.* Single-shot Ad26 vaccine protects against SARS-CoV-2 in rhesus  
558 macaques. *Nature* **586**, 583–588 (2020).
- 559 3. Tostanoski, L. H. *et al.* Ad26 vaccine protects against SARS-CoV-2 severe clinical  
560 disease in hamsters. *Nat. Med.* **26**, 1694–1700 (2020).
- 561 4. Bos, R. *et al.* Ad26 vector-based COVID-19 vaccine encoding a prefusion-stabilized  
562 SARS-CoV-2 Spike immunogen induces potent humoral and cellular immune responses.  
563 *NPJ Vaccines* **5**, 91 (2020).
- 564 5. Sadoff, J. *et al.* Safety and immunogenicity of the Ad26.COV2.S COVID-19 vaccine  
565 candidate: interim results of a phase 1/2a, double-blind, randomized, placebo-controlled  
566 trial. *medRxiv* 1–13 (2020).
- 567 6. van Doremalen, N. *et al.* ChAdOx1 nCoV-19 vaccine prevents SARS-CoV-2 pneumonia  
568 in rhesus macaques. *Nature* (2020) doi:10.1038/s41586-020-2608-y.
- 569 7. Guebre-Xabier, M. *et al.* NVX-CoV2373 vaccine protects cynomolgus macaque upper  
570 and lower airways against SARS-CoV-2 challenge. *Vaccine* **38**, 7892–7896 (2020).
- 571 8. Corbett, K. S. *et al.* Evaluation of the mRNA-1273 Vaccine against SARS-CoV-2 in  
572 Nonhuman Primates. *N. Engl. J. Med.* 1–12 (2020) doi:10.1056/nejmoa2024671.
- 573 9. Sia, S. F. *et al.* Pathogenesis and transmission of SARS-CoV-2 in golden hamsters. *Nature*  
574 (2020) doi:10.1038/s41586-020-2342-5.
- 575 10. Imai, M. *et al.* Syrian hamsters as a small animal model for SARS-CoV-2 infection and  
576 countermeasure development. *Proc. Natl. Acad. Sci. U. S. A.* (2020)

- 577 doi:10.1073/pnas.2009799117.
- 578 11. Chan, J. F.-W. *et al.* Simulation of the clinical and pathological manifestations of  
579 Coronavirus Disease 2019 (COVID-19) in golden Syrian hamster model: implications for  
580 disease pathogenesis and transmissibility. *Clin. Infect. Dis.* 1–50 (2020)  
581 doi:10.1093/cid/ciaa325.
- 582 12. Fajnzylber, J. *et al.* SARS-CoV-2 viral load is associated with increased disease severity  
583 and mortality. *Nat Commun* **11**, 5493 (2020).
- 584 13. Pujadas, E. *et al.* SARS-CoV-2 viral load predicts COVID-19 mortality. *Lancet Respir*  
585 *Med* **8**, e70 (2020).
- 586 14. Tseng, C. T. *et al.* Immunization with SARS coronavirus vaccines leads to pulmonary  
587 immunopathology on challenge with the SARS virus. *PLoS One* **7**, e35421 (2012).
- 588 15. Gudbjartsson, D. F. *et al.* Spread of SARS-CoV-2 in the Icelandic Population. *N. Engl. J.*  
589 *Med.* **382**, 2302–2315 (2020).
- 590 16. Korber, B. *et al.* Tracking Changes in SARS-CoV-2 Spike: Evidence that D614G  
591 Increases Infectivity of the COVID-19 Virus. *Cell* **182**, 812–827 e19 (2020).
- 592 17. Hou, Y. J. *et al.* SARS-CoV-2 D614G variant exhibits efficient replication ex vivo and  
593 transmission in vivo. *Science (80-. )*. eabe8499 (2020) doi:10.1126/science.abe8499.
- 594 18. Kemp, S. *et al.* Recurrent emergence and transmission of a SARS-CoV-2 Spike deletion  
595 dH69/V70. *bioRxiv Prepr.* (2020) doi:10.1101/2020.12.14.422555.
- 596 19. Oude Munnink, B. B. *et al.* Transmission of SARS-CoV-2 on mink farms between  
597 humans and mink and back to humans. *Science (80-. )*. **5901**, eabe5901 (2020).
- 598 20. Thomson, E. C. *et al.* The circulating SARS-CoV-2 spike variant N439K maintains fitness  
599 while evading antibody-mediated immunity. *bioRxiv* (2020).

- 600 21. Plante, J. A. *et al.* Spike mutation D614G alters SARS-CoV-2 fitness. *Nature* (2020)  
601 doi:10.1038/s41586-020-2895-3.
- 602 22. Jackson, C. B., Zhang, L., Farzan, M. & Choe, H. Functional importance of the D614G  
603 mutation in the SARS-CoV-2 spike protein. *Biochem. Biophys. Res. Commun.* (2020)  
604 doi:10.1016/j.bbrc.2020.11.026.
- 605 23. Graham, B. S. Biological challenges and technological opportunities for respiratory  
606 syncytial virus vaccine development. *Immunol. Rev.* **239**, 149–166 (2011).
- 607 24. Honda-Okubo, Y. *et al.* Severe acute respiratory syndrome-associated coronavirus  
608 vaccines formulated with delta inulin adjuvants provide enhanced protection while  
609 ameliorating lung eosinophilic immunopathology. *J Virol* **89**, 2995–3007 (2015).
- 610 25. Iwata-Yoshikawa, N. *et al.* Effects of Toll-Like Receptor Stimulation on Eosinophilic  
611 Infiltration in Lungs of BALB/c Mice Immunized with UV-Inactivated Severe Acute  
612 Respiratory Syndrome-Related Coronavirus Vaccine. *J. Virol.* **88**, 8597–8614 (2014).
- 613 26. Agrawal, A. S. *et al.* Immunization with inactivated Middle East Respiratory Syndrome  
614 coronavirus vaccine leads to lung immunopathology on challenge with live virus. *Hum.*  
615 *Vaccines Immunother.* **12**, 2351–2356 (2016).
- 616 27. Bolles, M. *et al.* A Double-Inactivated Severe Acute Respiratory Syndrome Coronavirus  
617 Vaccine Provides Incomplete Protection in Mice and Induces Increased Eosinophilic  
618 Proinflammatory Pulmonary Response upon Challenge. *J. Virol.* **85**, 12201–12215 (2011).
- 619 28. Deming, D. *et al.* Vaccine efficacy in senescent mice challenged with recombinant SARS-  
620 CoV bearing epidemic and zoonotic spike variants. *PLoS Med.* **3**, 2359–2375 (2006).
- 621 29. Honda-Okubo, Y. *et al.* Severe Acute Respiratory Syndrome-Associated Coronavirus  
622 Vaccines Formulated with Delta Inulin Adjuvants Provide Enhanced Protection while

- 623 Ameliorating Lung Eosinophilic Immunopathology. *J. Virol.* **89**, 2995–3007 (2015).
- 624 30. Houser, K. V. *et al.* Enhanced inflammation in New Zealand white rabbits when MERS-  
625 CoV reinfection occurs in the absence of neutralizing antibody. *PLoS Pathog.* **13**, 1–25  
626 (2017).
- 627 31. Committee for Medicinal Products for Human Use. *EMA Summary of opinion on*  
628 *Zabdeno, Ebola vaccine Ad26.ZEBOV-GP*. vol. CHMP/13817 (2020).
- 629 32. Barouch, D. H. *et al.* Evaluation of a mosaic HIV-1 vaccine in a multicentre, randomised,  
630 double-blind, placebo-controlled, phase 1/2a clinical trial (APPROACH) and in rhesus  
631 monkeys (NHP 13-19). *Lancet* **392**, 232–243 (2018).
- 632 33. Salisch, N. C. *et al.* Adenovectors encoding RSV-F protein induce durable and mucosal  
633 immunity in macaques after two intramuscular administrations. *NPJ Vaccines* **4**, 54  
634 (2019).
- 635 34. van der Fits, L. *et al.* Adenovector 26 encoded prefusion conformation stabilized RSV-F  
636 protein induces long-lasting Th1-biased immunity in neonatal mice. *NPJ Vaccines* **5**, 49  
637 (2020).
- 638 35. Widjojoatmodjo, M. N. *et al.* Recombinant low-seroprevalent adenoviral vectors Ad26  
639 and Ad35 expressing the respiratory syncytial virus (RSV) fusion protein induce  
640 protective immunity against RSV infection in cotton rats. *Vaccine* **33**, 5406–5414 (2015).
- 641 36. Solfrosi, L., Kuipers, H., Huber, S. K. R. & Lubbe, J. E. M. Van Der. Immunogenicity  
642 and protective efficacy of one- and two-dose regimens of the Ad26.COVS.S COVID-19  
643 vaccine candidate in adult and aged rhesus macaques. *bioRxiv Prepr.* (2021).
- 644 37. Solfrosi, L. *et al.* Immunogenicity of one- and two-dose regimens of the Ad26.COVS.S  
645 COVID-19 vaccine candidate in adult and aged rhesus macaques. *bioRxiv* (2020).



- 646 38. Johansen, M. D. *et al.* Animal and translational models of SARS-CoV-2 infection and  
647 COVID-19. *Mucosal Immunol.* **13**, 877–891 (2020).
- 648 39. Hoffmann, M. *et al.* SARS-CoV-2 Cell Entry Depends on ACE2 and TMPRSS2 and Is  
649 Blocked by a Clinically Proven Protease Inhibitor Article SARS-CoV-2 Cell Entry  
650 Depends on ACE2 and TMPRSS2 and Is Blocked by a Clinically Proven Protease  
651 Inhibitor. *Cell* **181**, 1–10 (2020).
- 652 40. Takano, T., Yamada, S., Doki, T. & Hohdatsu, T. Pathogenesis of oral type I feline  
653 infectious peritonitis virus (FIPV) infection: Antibody-dependent enhancement infection  
654 of cats with type I FIPV via the oral route. *J Vet Med Sci* **81**, 911–915 (2019).
- 655 41. Abbink, P. *et al.* Comparative Seroprevalence and Immunogenicity of Six Rare Serotype  
656 Recombinant Adenovirus Vaccine Vectors from Subgroups B and D. *J. Virol.* **81**, 4654–  
657 4663 (2007).
- 658 42. Wunderlich, K., Uil, T. G., Vellinga, J., Sanders, B. P. & VLUGT, R. VAN DER. Potent  
659 and short promoter for expression of heterologous genes. (2018).
- 660 43. Zahn, R. *et al.* Ad35 and Ad26 Vaccine Vectors Induce Potent and Cross-Reactive  
661 Antibody and T-Cell Responses to Multiple Filovirus Species. *PLoS One* **7**, 1–13 (2012).
- 662 44. Algaissi, A. & Hashem, A. M. Evaluation of MERS-CoV Neutralizing Antibodies in Sera  
663 Using Live Virus Microneutralization Assay. in *Vijay R. (eds) MERS Coronavirus.*  
664 *Methods in Molecular Biology, vol 2099* 107–116 (Humana, New York, 2020).  
665 doi:10.1007/978-1-0716-0211-9\_9.
- 666 45. Hierholzer, J.C. & Killington, R. . *Virology Methods Manual - Virus isolation and*  
667 *quantitation.* (Academic Press, 1996). doi:10.1016/B978-0-12-465330-6.X5000-3.
- 668 46. Firth, D. Bias Reduction of Maximum Likelihood Estimates. *Biometrika* **80**, 27 (1993).

670 **FIGURE LEGENDS**

671 **Figure 1. Titration of SARS-CoV-2 challenge dose and characterization of histopathology in**

672 **Syrian hamsters.** Syrian hamsters (N = 12 per group), were inoculated intra-nasally with  $10^2$ ,

673  $10^{3.3}$ ,  $10^{4.6}$  or  $10^{5.9}$  TCID<sub>50</sub> SARS-CoV-2 BetaCoV/Munich/BavPat1/2020, or mock-inoculated

674 with Vero E6 cell-supernatant. Daily throat swabs were taken, and 2, 3, 4, and 7 days p.i., 3

675 hamsters per group were sacrificed and nose and lung tissue collected for virological analysis and

676 histopathology. Replication competent viral load in **a)** lung tissue, **b)** nose tissue, and **c)** throat

677 swabs, was determined by TCID<sub>50</sub> assay on Vero E6 cells. LLOD was calculated per animal per

678 gram or milliliter of tissue, and animals with a response at or below the LLOD are shown as open

679 symbols. **d)** Lung tissue was analyzed and scored for presence and severity of alveolitis, alveolar

680 damage, alveolar edema, alveolar hemorrhage, type II pneumocyte hyperplasia, bronchitis,

681 bronchiolitis, peribronchial and perivascular cuffing. Sum of scores are presented as sum of LRT

682 disease parameters (potential range: 0 – 24). **e)** Nose tissue was analyzed and scored for severity

683 of rhinitis on a scale from 0 to 3. Dotted lines indicate the minimal and maximal scores of

684 histopathology.

685 Median responses per group are indicated with horizontal lines, error bars in panel c indicate the

686 range.

687 p.i. = post inoculation; LLOD = lower limit of detection; LRT = lower respiratory tract; N =

688 number of animals; TCID<sub>50</sub>/g = 50% tissue culture infective dose per gram tissue; TCID<sub>50</sub>/ml =

689 50% tissue culture infective dose per milliliter sample; vp = virus particles.

690

691 **Figure 2. SARS-CoV-2 neutralizing antibody response elicited by 1- and 2-dose**

692 **Ad26.COVS vaccine regimes in Syrian hamsters.** a) Syrian hamsters were immunized with

693 either  $10^9$  or  $10^{10}$  VP (N=12 per dose level) of Ad26-based vaccines , or with  $10^{10}$  vp of an Ad26  
694 vector without gene insert as control (Ad26.empty, N=6). Four weeks after immunization half the  
695 hamsters per group received a second immunization with the same Ad26-based vaccine (N=6 per  
696 group). **b)** SARS-CoV-2 neutralization titers were measured 4 weeks after dose 1 and **c)** 4 weeks  
697 after dose 2 by wild-type VNA determining the inhibition of the cytopathic effect of SARS-CoV-  
698 2 on Vero E6 cells. The sera from Syrian hamsters immunized with Ad26.Empty were pooled into  
699 2 groups for negative control samples. Median responses per group are indicated with horizontal  
700 lines. Dotted lines indicate the LLOD. Animals with a response at or below the LLOD are  
701 displayed as open symbols on the LLOD. CPE = cytopathic effect; LLOD = Lower Limit of  
702 Detection; p.i. = post inoculation; VNA = virus neutralization assay; VP = virus particles.

703

704 **Figure 3. Protection against SARS-CoV-2 viral replication in Syrian hamsters immunized**  
705 **with Ad26-based vaccines.** Syrian hamsters were intramuscularly immunized with a 1-dose  
706 regimen and a 2-dose regimen of Ad26.S, Ad26.dTM.PP, Ad26.COV2.S, or Ad26.empty (Ad26  
707 vector not encoding any SARS-CoV-2 antigens). Hamsters received an intranasal inoculation with  
708  $10^2$  TCID<sub>50</sub> SARS-CoV-2 strain BetaCoV/Munich/BavPat1/2020 4 weeks post-dose 1 (week 4) or  
709 4 weeks post-dose 2 (week 8). **a, b)** Right lung tissue and **c, d)** right nasal turbinates were harvested  
710 at the end of the 4-day inoculation phase for viral load analysis. Replication competent virus was  
711 measured by TCID<sub>50</sub> assay. **e, f)** Throat swab samples were taken daily after inoculation, and viral  
712 load area under the curve during the four-day follow-up was calculated as TCID<sub>50</sub>/ml x day. The  
713 median viral load per group is indicated with a horizontal line. LLOD was calculated per animal  
714 and animals with a response at or below the LLOD are shown as open symbols on the LLOD.  
715 Comparisons were performed between the Ad26.S, Ad26.dTM.PP and Ad26.COV2.S groups

716 across dose level, with the Ad26.empty group by Mann-Whitney U-test. Statistical differences  
717 indicated by asterisks: \*:  $p < 0.05$ ; \*\*:  $p < 0.01$ .

718 LLOD = lower limit of detection; TCID<sub>50</sub>/g = 50% tissue culture infective dose per gram tissue;  
719 TCID<sub>50</sub>/ml = 50% tissue culture infective dose per ml sample; VP = virus particles.

720

721 **Figure 4. Dose responsiveness of Ad26.COV2.S on immunogenicity and lung viral load in**  
722 **hamsters.** Syrian hamsters were intramuscularly immunized with  $10^7$ ,  $10^8$ ,  $10^9$  or  $10^{10}$  VP of  
723 Ad26.COV2.S N=8 per group, or  $10^{10}$  VP Ad26.Irr (an Ad26 vector not encoding any SARS-CoV-  
724 2 antigens, N=8). Four weeks after one immunization, SARS-CoV-2 Spike protein-specific  
725 antibody binding titers as measured by ELISA (**a**) and SARS-CoV-2 neutralizing antibodies as  
726 measured by wtVNA (**b**) were determined. The median antibody responses per group is indicated  
727 with a horizontal line. Dotted lines indicate the LLOD. Animals with a response at or below the  
728 LLOD were put on LLOD and are shown as open symbols. Hamsters received intranasal  
729 inoculation with  $10^2$  TCID<sub>50</sub> SARS-CoV-2 strain BetaCoV/Munich/BavPat1/2020 4 weeks post  
730 immunization (week 4). Right lung tissue was isolated 4 days after inoculation for virological  
731 analysis and immunohistochemistry. **c**) Lung viral load was determined by TCID<sub>50</sub> assay on Vero  
732 E6 cells. The median viral load per group is indicated with a horizontal line. LLOD was calculated  
733 per animal, and animals with a response at or below the LLOD are shown as open symbols. **d**)  
734 presence of SARS-CoV-2 NP was determined by immunohistochemical staining.

735 Comparisons were performed between the Ad26.COVS.S dose level groups, with the Ad26.Irr  
736 group by Mann-Whitney U-test. Statistical differences indicated by asterisks: \*:p<0.05;  
737 \*\*:p<0.01; \*\*\*:p<0.001.

738 Ad26.Irr = Ad26 vector not encoding any SARS-CoV-2 antigens; LLOD = lower limit of  
739 detection; N = number of animals; TCID<sub>50</sub>/g = 50% tissue culture infective dose per gram tissue;  
740 VP = virus particles; NP = Nucleocapsid protein; wtVNA = wild-type virus neutralization assay.

741

742 **Figure 5. No signs of VAERD in Ad26 immunized Syrian hamsters inoculated with SARS-**  
743 **CoV-2** Four days after IN inoculation with 10<sup>2</sup> TCID<sub>50</sub> SARS-CoV-2 (N = 8 per group), **a)** lung  
744 tissue was isolated and scored for presence and severity of alveolitis, alveolar damage, alveolar  
745 edema, alveolar hemorrhage, type II pneumocyte hyperplasia, bronchitis, bronchiolitis,  
746 peribronchial and perivascular cuffing. Sum of scores are presented as sum of LRT disease  
747 parameters. **b)** Four days after inoculation, nose tissue was isolated and scored for severity of  
748 inflammation (rhinitis).

749 Horizontal lines denote a pathology score of 0, indicating no histopathology. Symbols in red  
750 denote samples from hamsters with breakthrough lung viral load (>10<sup>2</sup> TCID<sub>50</sub>/g). Comparisons  
751 were performed between the Ad26.COVS.S dose level groups, with the Ad26.Irr group by Mann-  
752 Whitney U-test. Statistical differences indicated by asterisks: \*:p<0.05; \*\*:p<0.01; \*\*\*:p<0.001.

753 Ad26.Irr = Ad26 vector not encoding any SARS-CoV-2 antigens; LRT = lower respiratory tract;  
754 N = number of animals; VP = virus particles.

755

756 **Figure 6. Binding and neutralizing antibodies correlate with protection.** Protection was  
757 defined as a viral load below 10<sup>2</sup> TCID<sub>50</sub>/g in lung tissue, irrespective of vaccine regimen and dose

758 level (see Fig 3A and B, and Fig 4C). Syrian hamsters were immunized once, or twice, with  $10^7$ ,  
759  $10^8$ ,  $10^9$ ,  $10^{10}$  VP Ad26.CoV2.S (N=56). Hamsters were inoculated with  $10^2$  TCID<sub>50</sub> SARS-CoV-  
760 2, and four days later sacrificed for virological analysis of lung tissue. Prior to virus inoculation  
761 serum samples were analyzed for **a**) antibody binding titers and **b**) virus neutralizing antibodies.  
762 Median antibody responses per group is indicated with horizontal lines. Dotted lines indicate the  
763 LLOD. **c**) Logistic regression models using Firth's correction were built with protection outcome  
764 as the dependent variable, and binding and neutralizing antibody titers from pooled regimens and  
765 dose levels of Ad26.COVID.S as independent variable. Dotted lines indicate the 95% confidence  
766 interval.

767 LLOD = lower limit of detection; N = number of animals; TCID<sub>50</sub>/g = 50% tissue culture infective  
768 dose per gram tissue; VP = virus particles.

**Figure 1: Titration of SARS-CoV-2 challenge dose and characterization of histopathology in Syrian hamsters**

**a) Lung viral load**

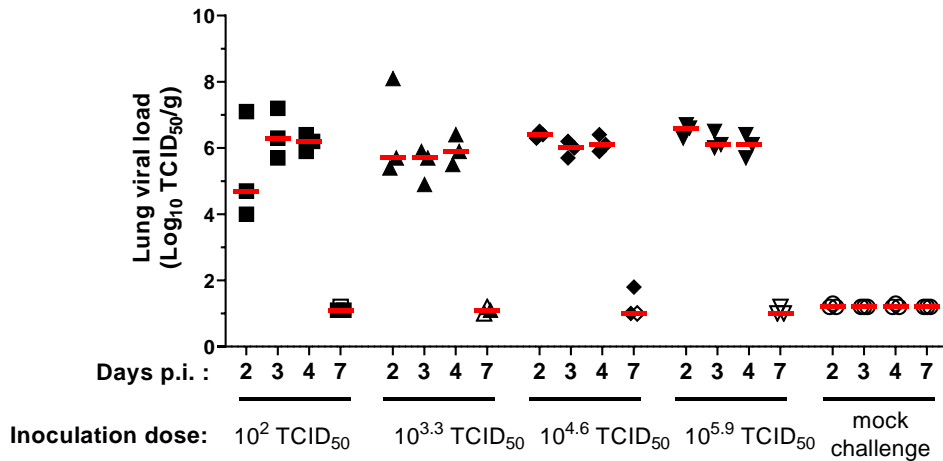

**b) Nose viral load**

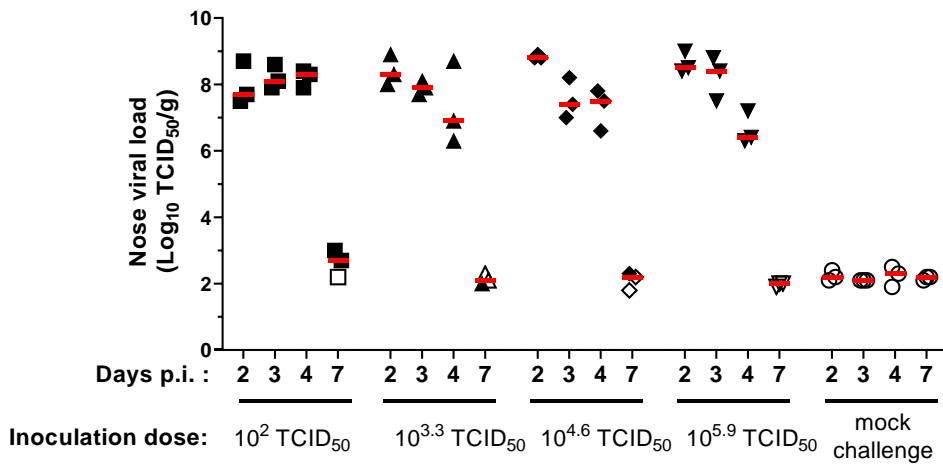

**c) Viral load in throat swabs**

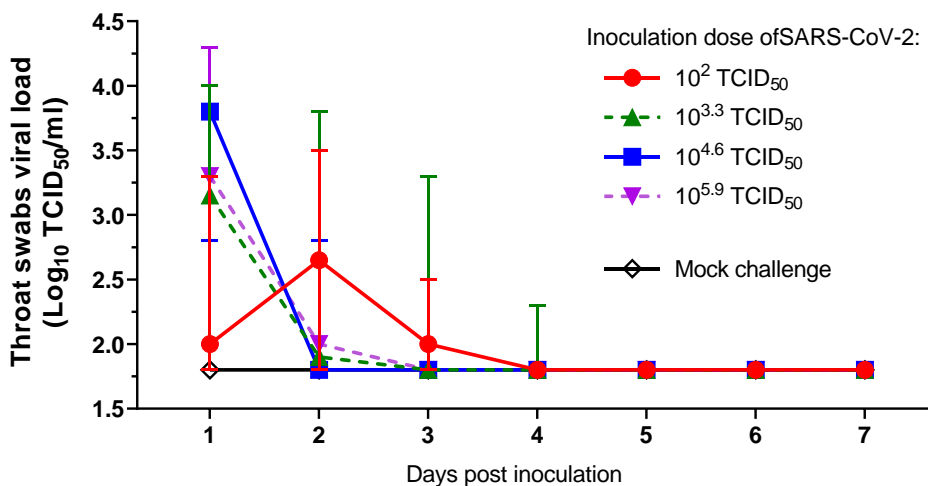

### d) LRT histopathology scoring

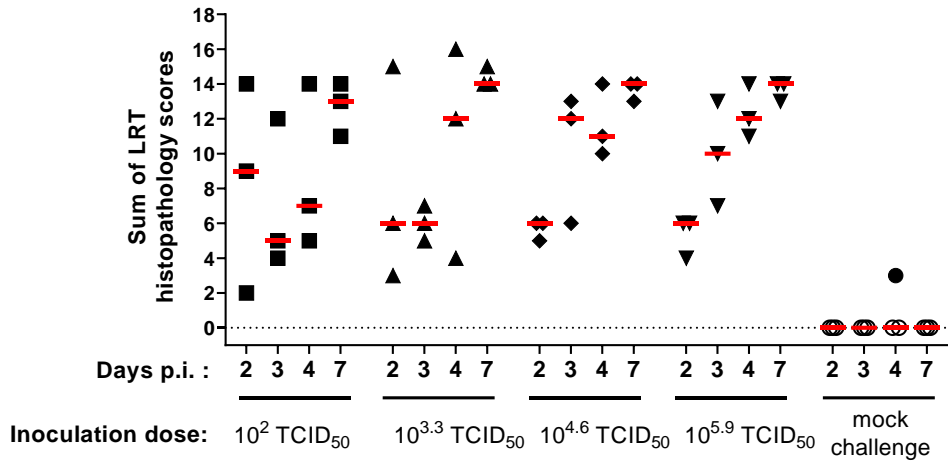

### e) histopathology scoring of nose tissue: severity of rhinitis

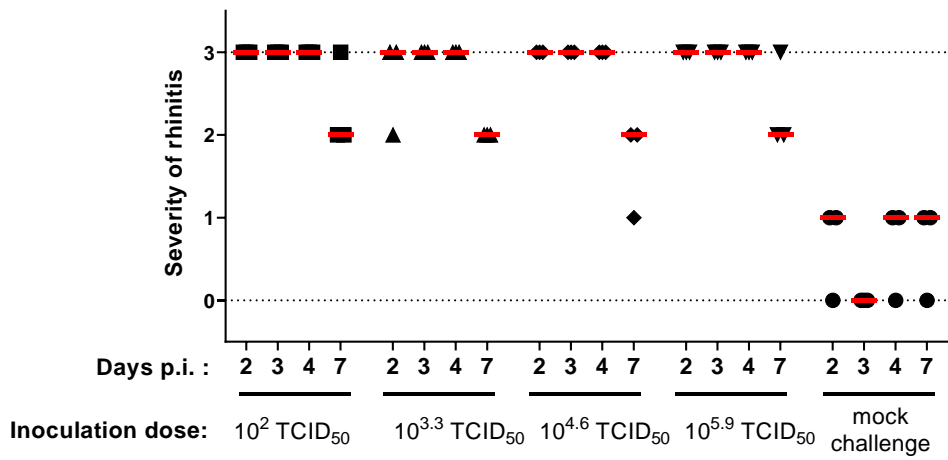



**Figure 2: SARS-CoV-2 neutralizing antibody response elicited by 1- and 2-dose Ad26.COVS.S vaccine regimens in Syrian hamsters**

**a) Study design**

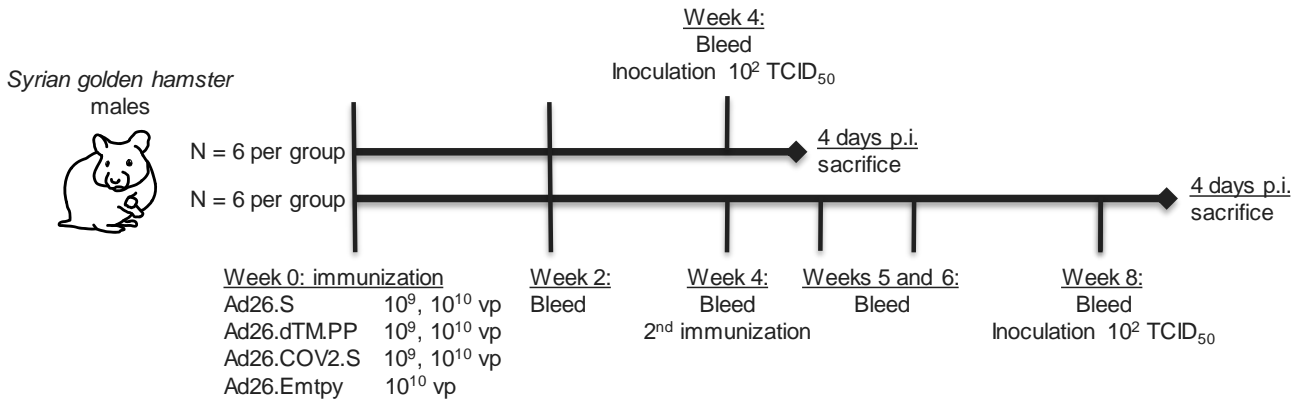

**b) 1-dose (neut = week 4)**

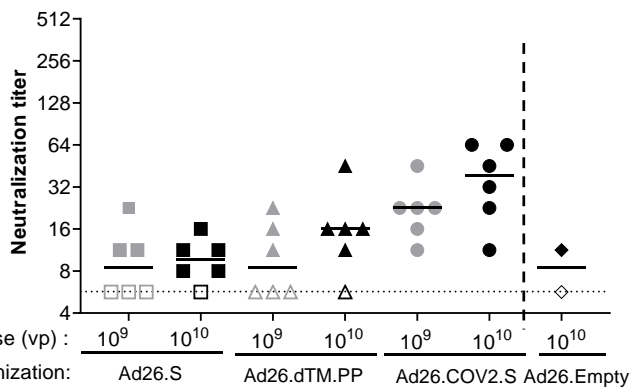

**c) 2-dose (neut = week 8)**

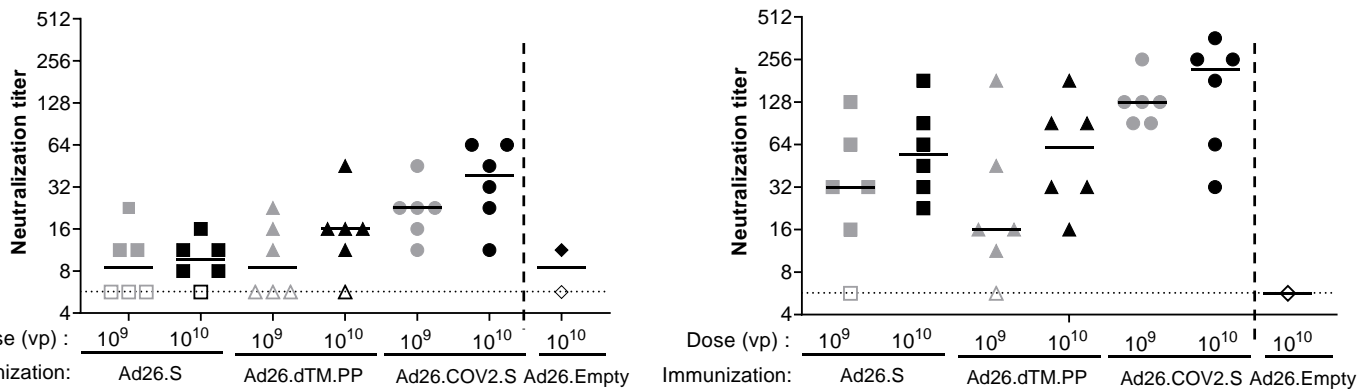

Figure 3: Protection

a) 1-dose Lung VL

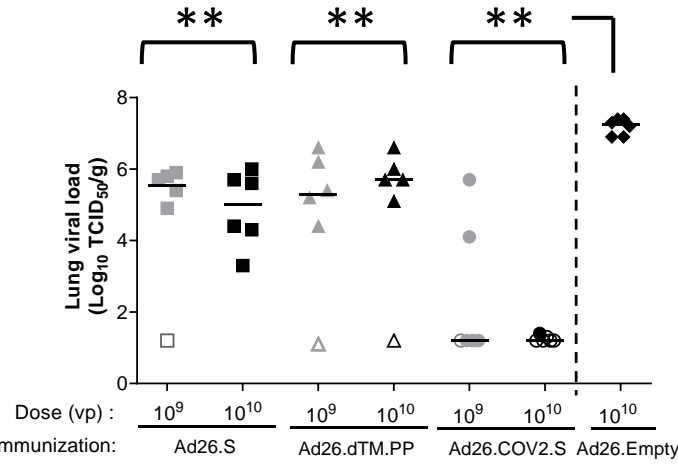

b) 2-dose Lung VL

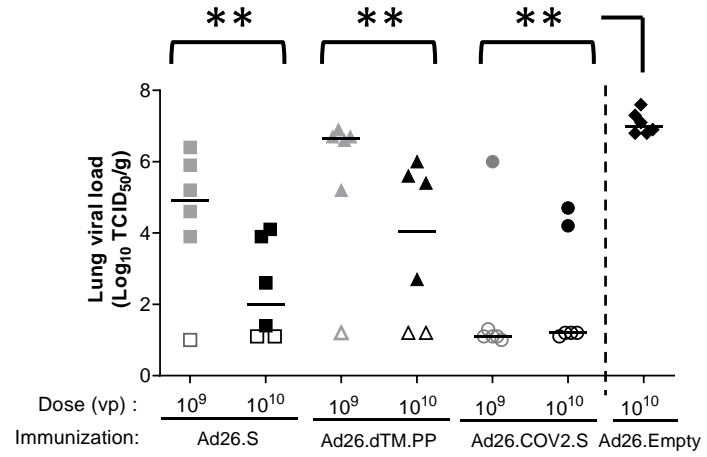

c) 1-dose nose VL

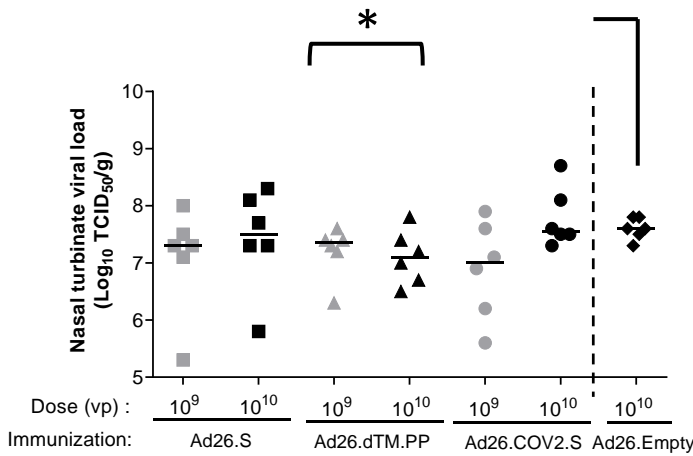

d) 2-dose nose VL

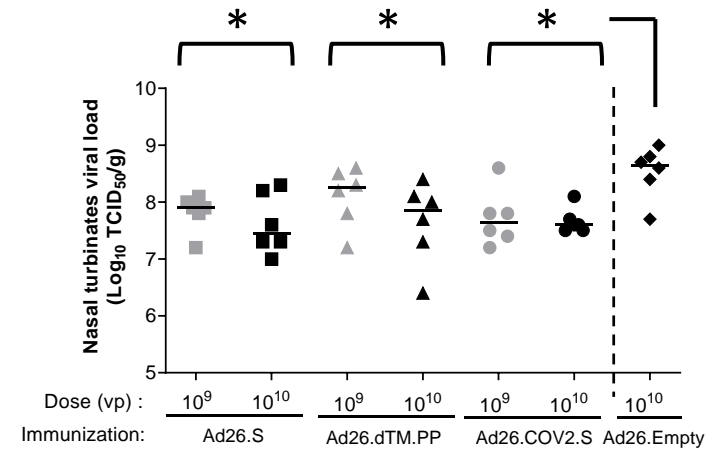

e) 1-dose throat VL

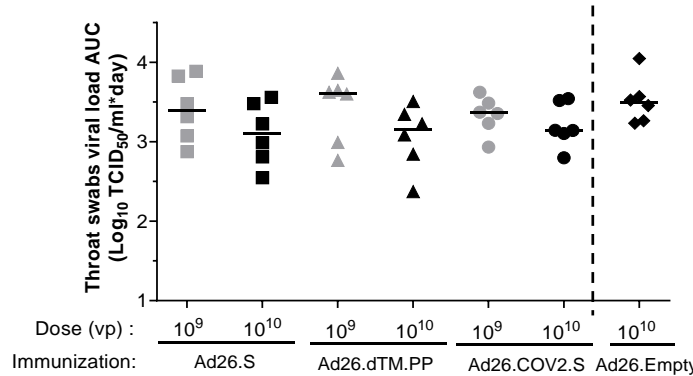

f) 2-dose throat VL

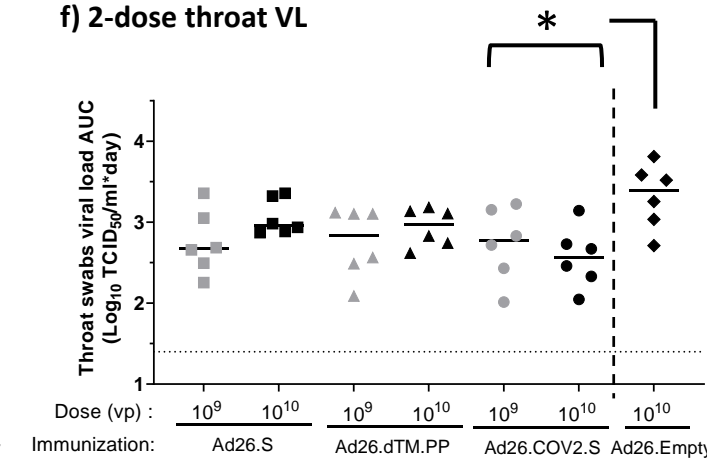

Figure 4: Ad26.COVS-S dose down study

a) Binding antibodies

b) nAbs

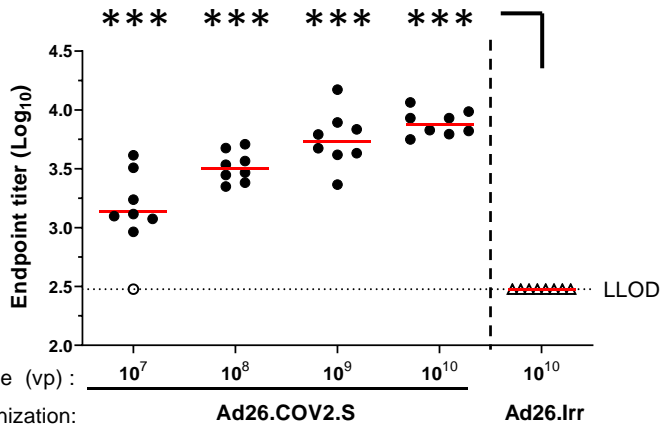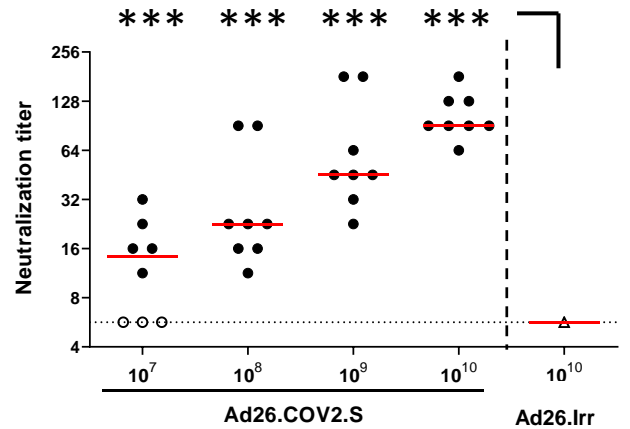

c) Lung VL

d) IHC lung parenchyma

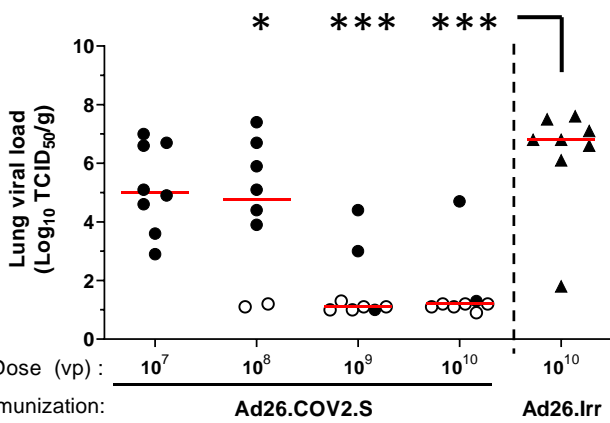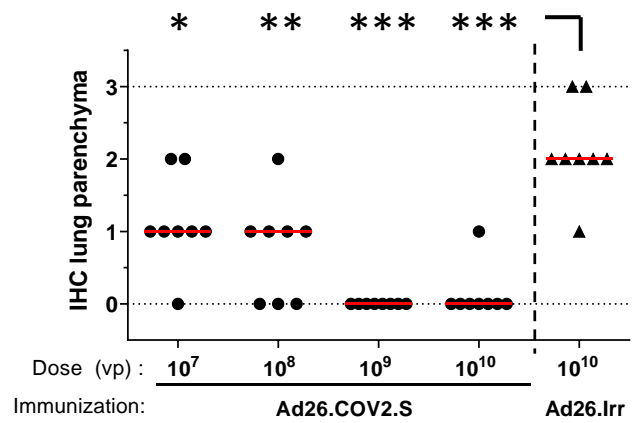



a) Lung VL vs ELISA

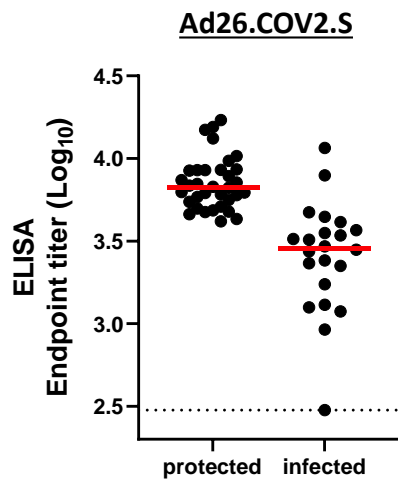

b) Lung VL vs wtVNA

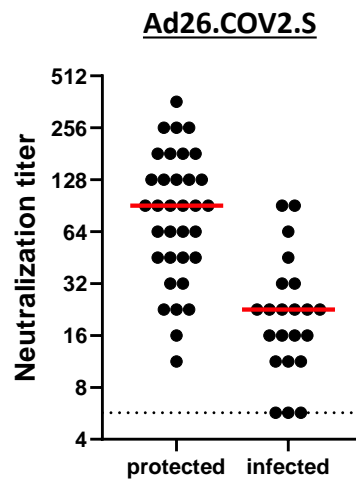

c) Logistic regression lung VL vs wtVNA and ELISA in Ad26.COVS.S immunized hamsters

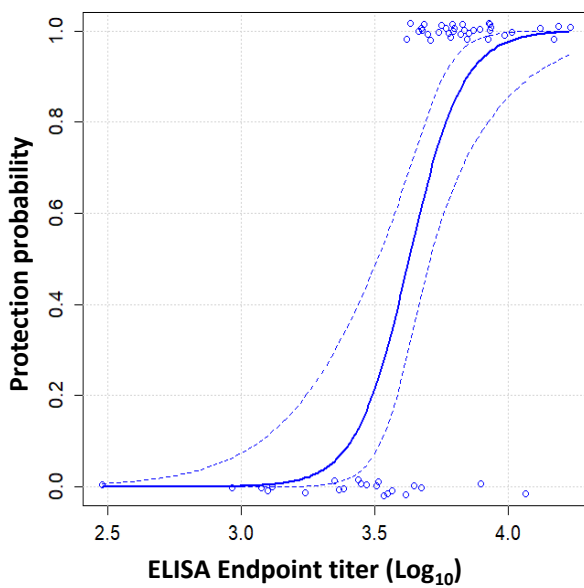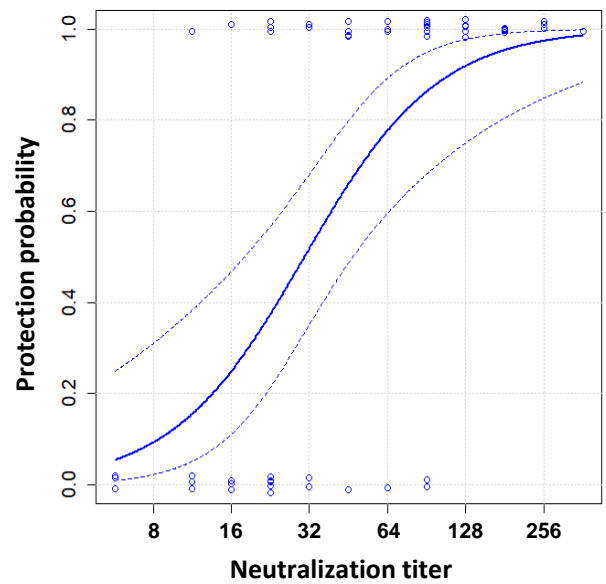

Source: https://www.biorxiv.org/content/10.1101/2021.01.08.425915v1.full.pdf
